# Supplementary material
Source: HighWire-hosted journal article supplement (https://bmjpaedsopen.bmj.com/content/2/1/e000010)

Appendix 1.

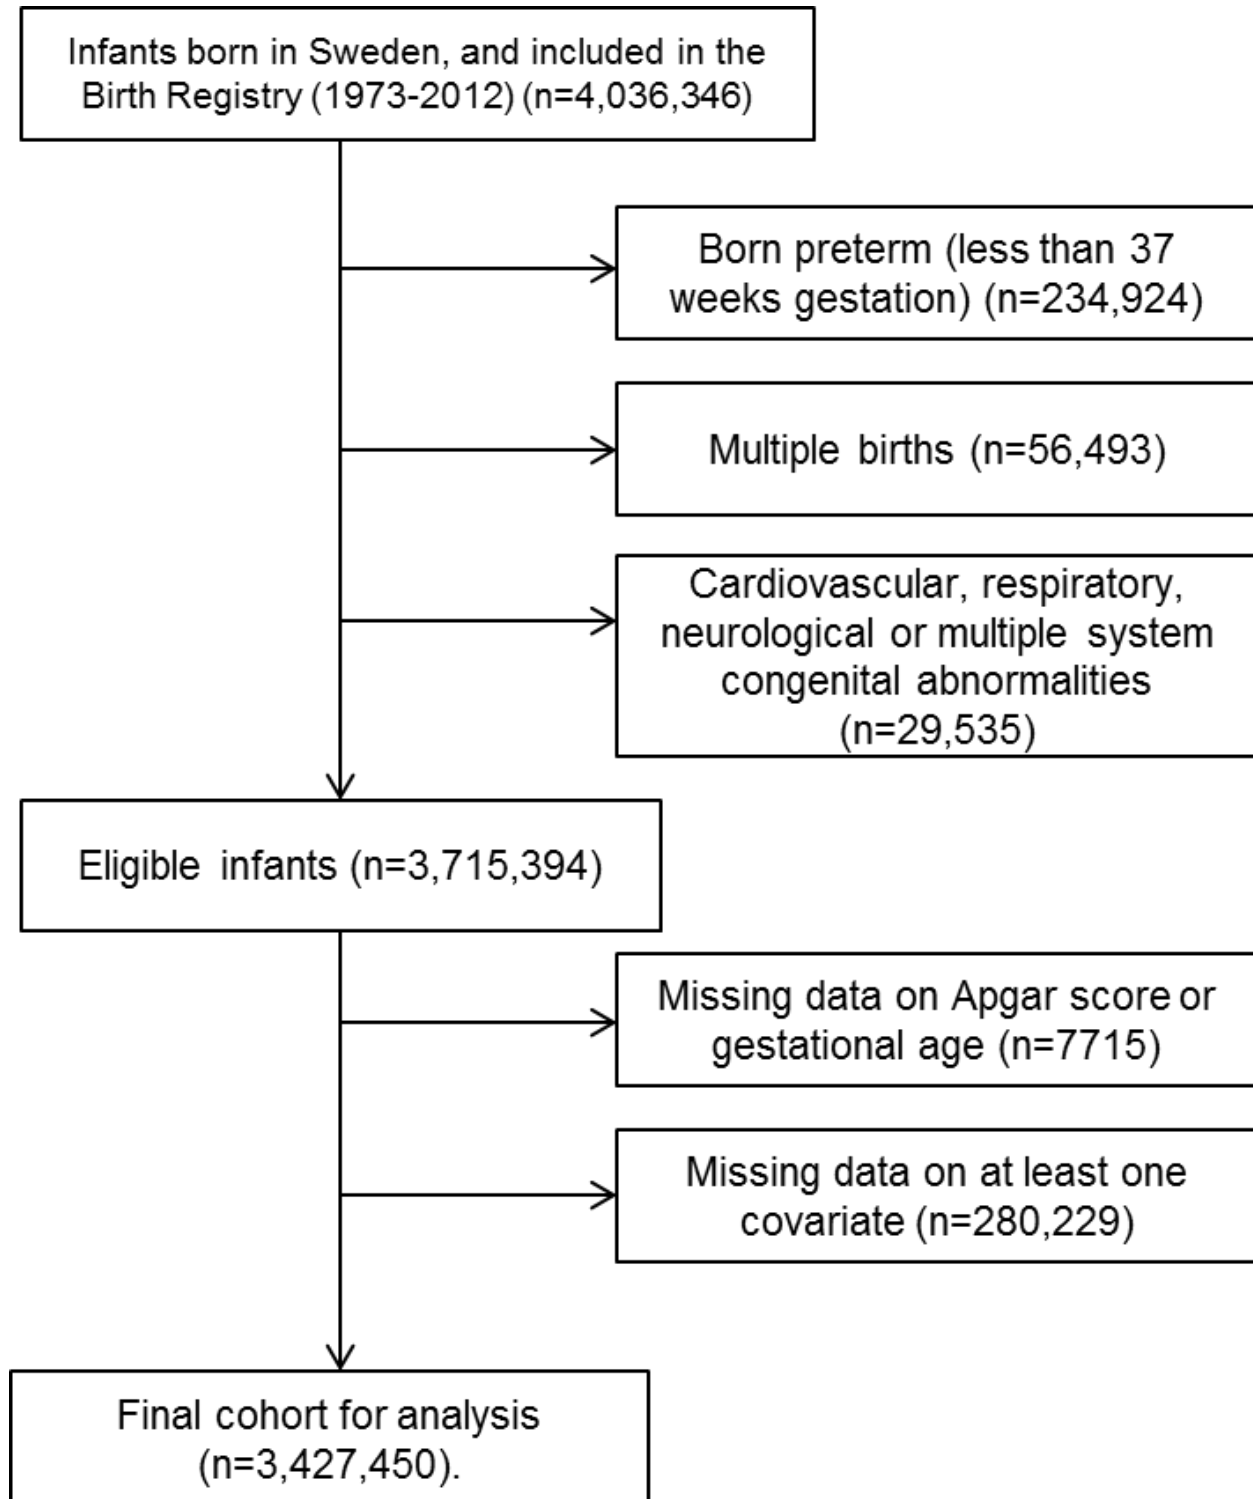

Supplement: inline-supplementary-material-1 [file inline-supplementary-material-1.pdf]
